# Supplementary material for: Multi-View Learning to Unravel the Different Levels Underlying Hepatitis B Vaccine Response
Source: MDPI journal article supplement (doi:10.3390/vaccines11071236), 2023-07-13
Supplement: s1 [file s1]

**Table S1. Comparison table of the baseline non-genetic attributes between early and late converters.**

| Dataset                | Feature                 | Early-converters (n=21)<br>average (range) | Late-converters (n=9)<br>average (range) |
|------------------------|-------------------------|--------------------------------------------|------------------------------------------|
| Metadata               | Age (years)             | 35.9 (21.3-50.2)                           | 44.19 (36.3-48.5)                        |
|                        | Temperature ([degree]C) | 36.60 (35.92-37.25)                        | 36.57 (35.35-37.19)                      |
|                        | Max BP (mmHg)           | 126.90 (98-148)                            | 122.11 (103-157)                         |
|                        | Min BP (mmHg)           | 75.62 (55-93)                              | 74.67 (59-105)                           |
|                        | Female/Male             | 13/8*                                      | 7/2*                                     |
| CD4+ T cell parameters | B0 (counts)             | 50790.38 (37866-71140)                     | 50237.89 (29330-87551)                   |
|                        | PPnrB0 (%)              | 2.71 (2.01-3.45)                           | 3.37 (1.72-5.62)                         |
|                        | PSB0 (%)                | 2.75 (1.87-3.87)                           | 2.49 (1.40%-4.53%)                       |
|                        | HepBTCRs (counts)       | 1.02 (0.74-1.36)                           | 0.78 (0.42-1.11)                         |
| Cell counts            | WBC0 (counts)           | 6.10 (3.6-9.4)                             | 6.74 (4.3-9.3)                           |
|                        | RBC0 (counts)           | 4.59 (3.94-5.21)                           | 4.60 (4.14-5.42)                         |
|                        | HGB0 (counts)           | 13.62 (11.5-15.5)                          | 13.30 (8.1-15.4)                         |
|                        | HCT0 (counts)           | 40.67 (35.0-46.4)                          | 39.82 (26.2-46.2)                        |
|                        | PLT0 (counts)           | 243.67 (144.0-351.0)                       | 242.89 (172.0-403.0)                     |
|                        | LYM0 (counts)           | 34.14 (19.5-47.8)                          | 29.7 (15.3-38.7)                         |
|                        | MON0 (counts)           | 4.79 (3.2-8.2)                             | 4.13 (2.5-7.4)                           |
|                        | GRA0 (counts)           | 61.07 (49.0-76.6)                          | 66.17 (57.4-77.3)                        |

See the original manuscripts [19], [24] for breakdown of features.

Maximum blood pressure (day 0) (Max BP); minimum blood pressure (day 0) (Min BP); total unique TCR sequences (day 0) (B0); fraction of HBs-Ag-aspecific (day 0) (PPnrB0); fraction of HBs-Ag-specific (day 0) (PSB0); normalised ratio of vaccine-specific TCRs (day 0) (HepBTCRs); white blood cells count (day 0) (WBC0); red blood cells count (day 0) (RBC0); haemoglobin protein count (day 0) (HGB0); hematocrit (day 0) (HCT0); platelets count (day 0) (PLT0); lymphocytes count (day 0) (LYM0); monocytes count (day 0) (MON0); granulocytes count (day 0) (GRA0). \*Number of individuals.

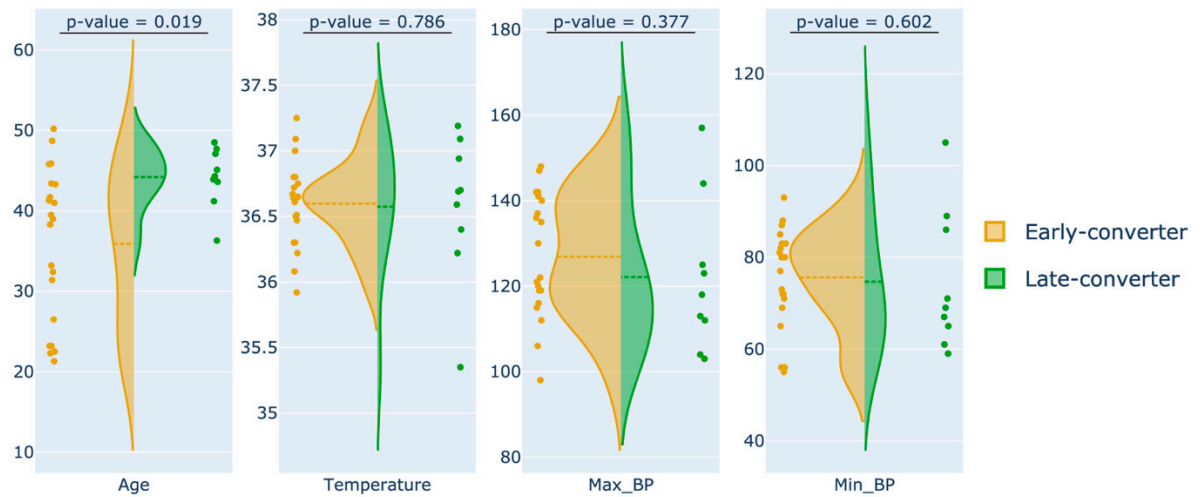

**Figure S1. Metadata distributions reveal age differences.** Metadata feature distributions per class. Age is significantly higher for late converters (p-value = 0.019, two-sided Mann-Whitney U-test).

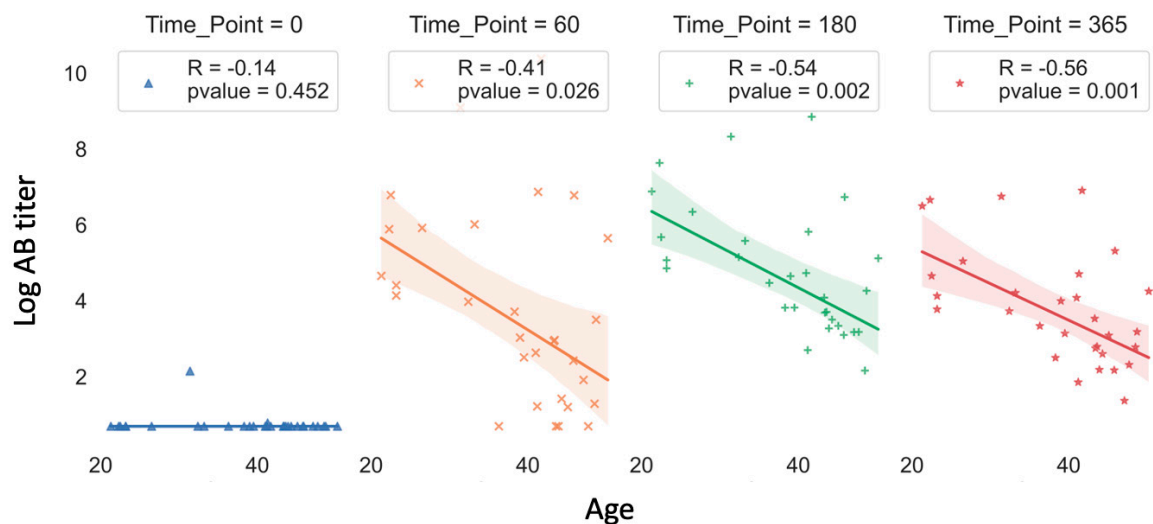

**Figure S2. Longitudinal analysis of AB titers shows anticorrelation with age.** Comparison between age and AB for early and late converters, presented at each timepoint of the study. Time is expressed in days from the first vaccine shot. Antibody (AB).

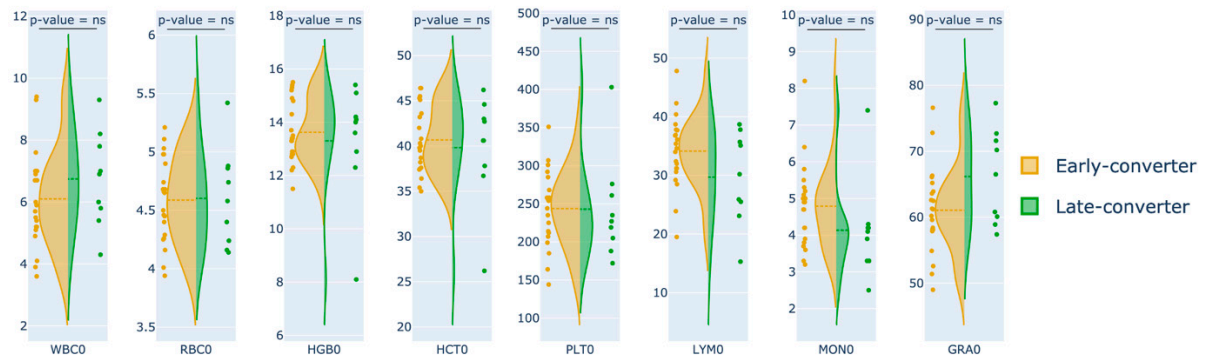

**Figure S3. Cell counts distributions reveal class differences.** Cell counts feature distributions per class. Granulocytes and monocytes appear in lower quantities, respectively, for early and late converters. However, possible outliers lead to non-significant differences.

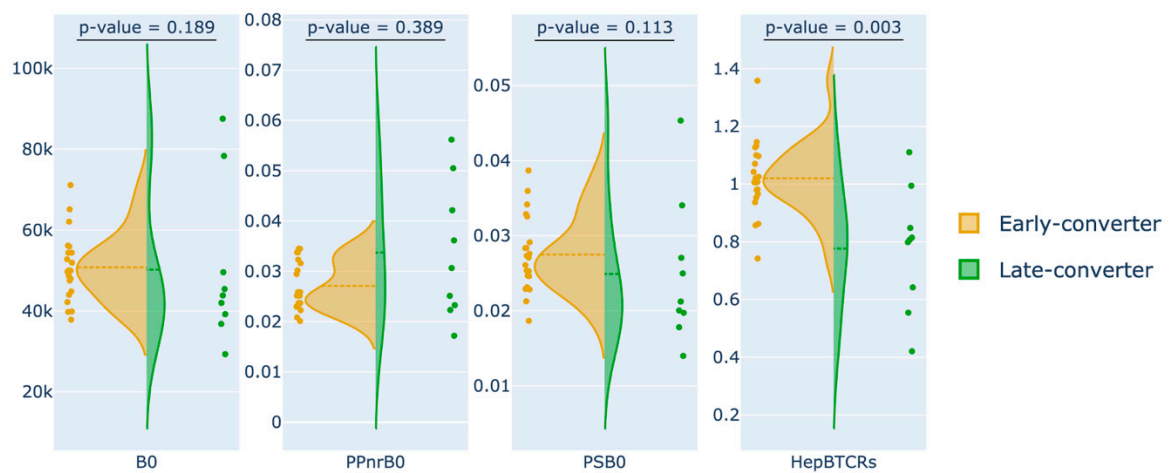

**Figure S4. CD4+ T cell parameters reveal class differences.** Pre-vaccination TCR data feature distribution per class. HepBTCRs are significantly elevated in early vaccine responses (p-value = 0.003, two-sided Mann-Whitney U-test). T-Cell Receptor (TCR).

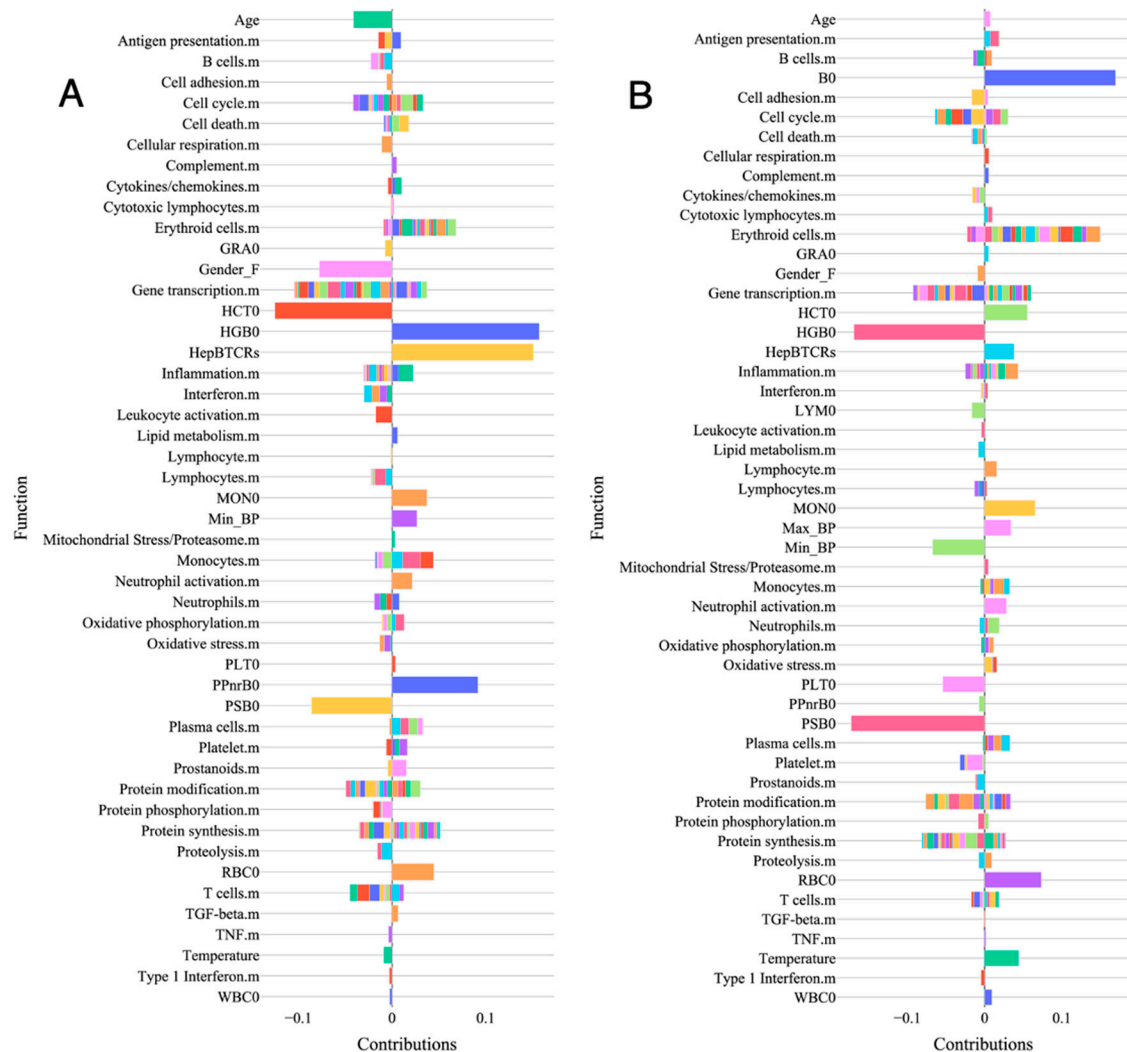

**Figure S5. MCCA reveals distinct contributions of the metadata and expression.** Visualisations of the loadings to the first (A) and second (B) dimensions of the MCCA projection. Coefficients were stacked by function, with null-values and modules without associated functionality being omitted. Multi-view Canonical Correlation Analysis (MCCA).

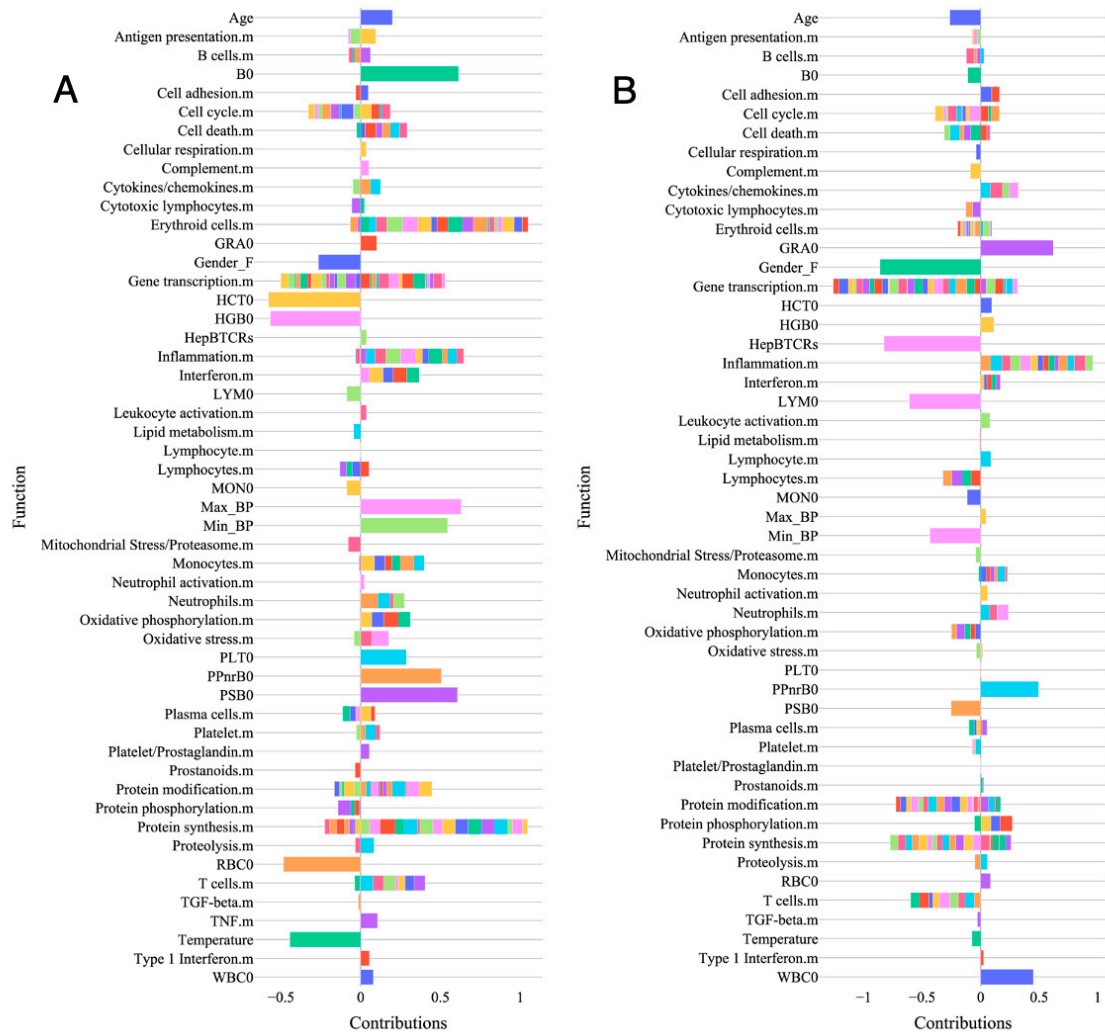

**Figure S6. GroupPCA components support MCCA findings and offer better interpretability.** Visualisations of the loadings to the first (A) and second (B) dimensions of the GroupPCA projection. Coefficients were stacked by function, with null-values and modules without associated functionality being omitted. Principal Component Analysis (PCA).

**Table S2. Performance table for the evaluation in terms of AUC and accuracy of a LR trained on single modality data.**

| View     | Cell counts | TCR-seq     | Metadata    | RNA-seq     |
|----------|-------------|-------------|-------------|-------------|
| Accuracy | 0.506±0.044 | 0.708±0.067 | 0.598±0.058 | 0.440±0.018 |
| AUC      | 0.430±0.038 | 0.731±0.040 | 0.588±0.028 | 0.611±0.009 |

Area Under Curve (AUC); Logistic Regression (LR).

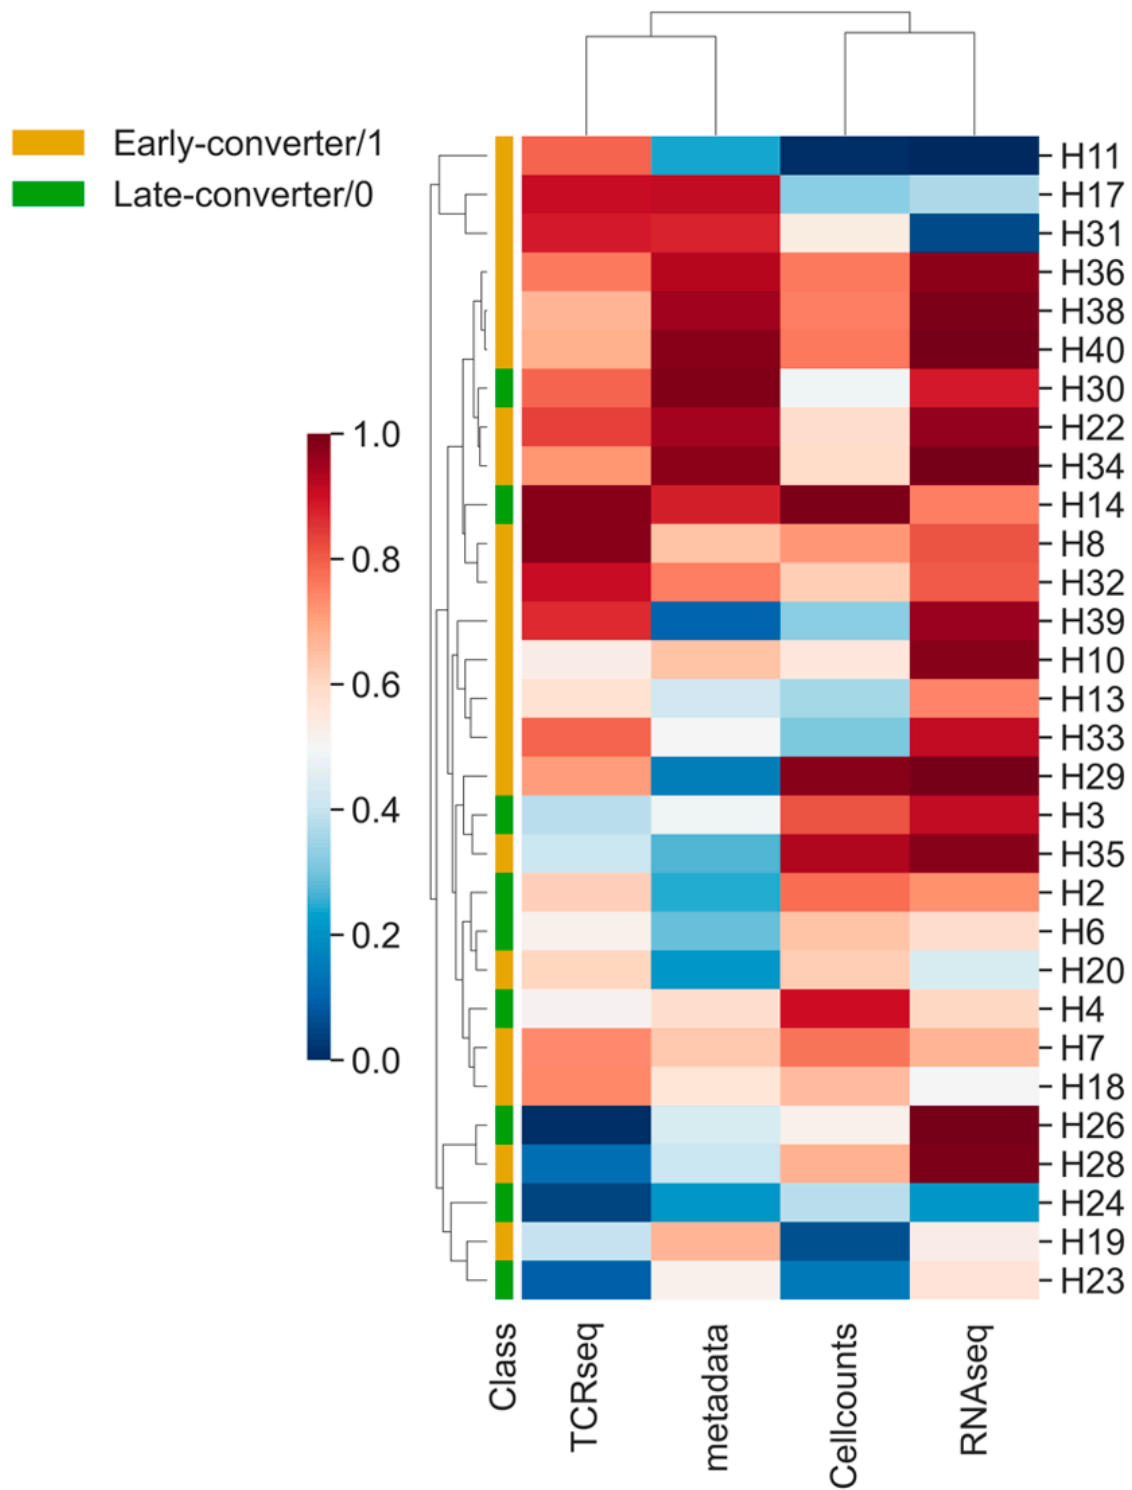

**Figure S7. Unimodal predicted probabilities show layer to layer difference in predictive power.** Predicted probabilities attributed to each patient of the cohort, per single data modality of a LOOCV LR. Leave-One-Out Cross-Validation (LOOCV).
